# Supplementary material
Source: PubMed Central journal article supplement (PMC8455049)
Supplement: CJN.16821020SupplementaryData.pdf [file CJN.16821020SupplementaryData.pdf]

## **Supplemental Material**

**Supplemental Table 1.** The per protocol analysis of the effects of oral energy supplements on nutritional status.

**Supplemental Table 2.** Effects of the 12-week energy supplementation on other laboratory markers.

**Supplemental Table 1.** The per protocol analysis of the effects of oral energy supplements on nutritional status.

| Variables, change <sup>a</sup>                  | Control<br>112 | Intervention<br>98 | Group difference<br>mean (95%CI) | <i>P</i> <sup>b</sup> |
|-------------------------------------------------|----------------|--------------------|----------------------------------|-----------------------|
| Phase angle, mean ± SD, °                       | 0 ± 0.5        | 0 ± 0.6            | 0 ( -0.1 , 0.2 )                 | 0.64                  |
| BMI, mean ± SD, kg/m <sup>2</sup>               | 0 ± 0.5        | 0.2 ± 0.5          | 0.2 ( 0.1 , 0.3 )                | 0.003                 |
| Handgrip strength, mean ± SD, kg                | 0.2 ± 5.3      | 0.8 ± 5.9          | 0.6 ( -0.9 , 2.2 )               | 0.42                  |
| Mid-arm muscle circumference,<br>mean ± SD, cm  | 0.1 ± 1        | 0.2 ± 1.1          | 0.1 ( -0.2 , 0.4 )               | 0.25                  |
| Albumin, mean ± SD, g/dL                        | -0.1 ± 0.3     | 0.1 ± 0.3          | 0.1 ( 0 , 0.2 )                  | 0.002                 |
| Prealbumin, mean ± SD, mg/dL                    | -0.8 ± 8.1     | 0 ± 4.4            | 0.8 ( -0.9 , 2.5 )               | 0.97                  |
| Transferrin, mean ± SD, mg/dL                   | -2.6 ± 27.1    | 3.5 ± 27.4         | 6.1 ( -1.3 , 13.6 )              | 0.40                  |
| Hemoglobin, mean ± SD, g/dL                     | 0 ± 1.9        | 0.3 ± 1.8          | 0.3 ( -0.2 , 0.8 )               | 0.32                  |
| Lean tissue index, mean ± SD, kg/m <sup>2</sup> | -0.1 ± 1.1     | -0.4 ± 1.1         | -0.3 ( -0.6, 0 )                 | 0.08                  |
| Fat tissue index, mean ± SD, kg/m <sup>2</sup>  | 0.1 ± 1.1      | 0.7 ± 1.1          | 0.6 ( 0.3, 0.9 )                 | <0.001                |

Abbreviations: BMI, body mass index.

<sup>a</sup> Change was defined as the value at week 12 minus the value at baseline.

<sup>b</sup> Difference in the change between groups was compared and tested using Wilcoxon-Mann-Whitney test.

**Supplemental Table 2.** Effects of the 12-week energy supplementation on other laboratory markers.

| Variables                                  | Control<br>117 | Intervention<br>119        | Group difference<br>mean(95%CI) | <i>P</i> |
|--------------------------------------------|----------------|----------------------------|---------------------------------|----------|
| <b>Triglyceride, mean ± SD, mg/dL</b>      |                |                            |                                 |          |
| Baseline                                   | 154.3 ± 118.4  | 168.3 ± 136.5              | 14 ( -18.9 , 46.8 )             | 0.4      |
| 12-week                                    | 165.5 ± 122.9  | 194.3 ± 170.4 <sup>b</sup> | 28.8 ( -9.4 , 67 )              | 0.14     |
| Change <sup>a</sup>                        | 10.9 ± 102.6   | 25.1 ± 133.1               | 14.2 ( -16.4 , 44.8 )           | 0.82     |
| <b>Total cholesterol, mean ± SD, mg/dL</b> |                |                            |                                 |          |
| Baseline                                   | 161.7 ± 41.2   | 158.8 ± 34.5               | -2.9 ( -12.7 , 6.9 )            | 0.56     |
| 12-week                                    | 157.4 ± 39.8   | 160.1 ± 33.8               | 2.8 ( -6.7 , 12.2 )             | 0.57     |
| Change <sup>a</sup>                        | -3.8 ± 24.4    | 1.3 ± 28.3                 | 5.1 ( -1.7 , 11.9 )             | 0.29     |
| <b>HDL, mean ± SD, mg/dL</b>               |                |                            |                                 |          |
| Baseline                                   | 40.3 ± 10.2    | 39.6 ± 11.1                | -0.7 ( -3.5 , 2 )               | 0.6      |
| 12-week                                    | 39.9 ± 9.4     | 40.1 ± 11.2                | 0.3 ( -2.4 , 2.9 )              | 0.85     |
| Change <sup>a</sup>                        | -0.3 ± 8.4     | 0.6 ± 6.7                  | 0.9 ( -1.1 , 2.8 )              | 0.28     |
| <b>LDL, mean ± SD, mg/dL</b>               |                |                            |                                 |          |
| Baseline                                   | 93.5 ± 31.5    | 90.7 ± 26.8                | -2.8 ( -10.4 , 4.8 )            | 0.46     |
| 12-week                                    | 94 ± 31.3      | 93.9 ± 26.2                | -0.1 ( -7.5 , 7.3 )             | 0.98     |
| Change <sup>a</sup>                        | 0.4 ± 20.9     | 3.3 ± 18.9                 | 2.9 ( -2.2 , 8.1 )              | 0.23     |
| <b>BUN, mean ± SD, mg/dL</b>               |                |                            |                                 |          |
| Baseline                                   | 74.1 ± 17.4    | 75.1 ± 19.2                | 1 ( -3.7 , 5.7 )                | 0.67     |
| 12-week                                    | 72.9 ± 15.4    | 68.4 ± 16.5 <sup>b</sup>   | -4.5 ( -8.6 , -0.4 )            | 0.03     |
| Change <sup>a</sup>                        | -1.1 ± 19.7    | -6.6 ± 17.1                | -5.5 ( -10.2 , -0.8 )           | 0.05     |
| <b>Phosphorus, mean ± SD, mg/dL</b>        |                |                            |                                 |          |
| Baseline                                   | 6.7 ± 2.2      | 7 ± 1.9                    | 0.3 ( -0.2 , 0.9 )              | 0.22     |
| 12-week                                    | 6.4 ± 2        | 6.4 ± 1.9 <sup>b</sup>     | 0 ( -0.5 , 0.6 )                | 0.85     |
| Change <sup>a</sup>                        | -0.3 ± 2       | -0.6 ± 1.9                 | -0.3 ( -0.8 , 0.2 )             | 0.22     |
| <b>CRP, median (IQR), mg/dL</b>            |                |                            |                                 |          |
| Baseline                                   | 0.2 (0.1-0.3)  | 0.2 (0.1-0.4)              | 0 ( -0.2 , 0.2 )                | 0.8      |
| 12-week                                    | 0.2 (0.1-0.3)  | 0.2 (0.1-0.4)              | 0 ( -0.2 , 0.2 )                | 0.27     |
| Change <sup>a</sup>                        | 0 ± 0.9        | 0 ± 0.4                    | 0 ( -0.2 , 0.2 )                | 0.42     |
| <b>White blood cell, mean ± SD, 103/ul</b> |                |                            |                                 |          |
| Baseline                                   | 6.1 ± 1.7      | 6.1 ± 1.5                  | 0 ( -0.4 , 0.4 )                | 0.96     |
| 12-week                                    | 6.2 ± 1.9      | 6.2 ± 1.5                  | 0 ( -0.5 , 0.4 )                | 0.91     |
| Change <sup>a</sup>                        | 0 ± 1.4        | 0.1 ± 1.2                  | 0.1 ( -0.3 , 0.4 )              | 0.76     |

Abbreviation: HDL, high-density lipoprotein; LDL, low-density lipoprotein; BUN, blood urea nitrogen; CRP, C-reactive protein.

<sup>a</sup> Change was defined as the value at week 12 minus the value at baseline.

<sup>b</sup> *P*<0.05, compared with the intervention group at baseline.
